# Supplementary material for: Thirty-Day Mortality of Persistent Methicillin-Resistant Staphylococcus aureus Bacteremia: Insights from a Retrospective Cohort Study
Source: PubMed Central journal article supplement — Yonsei Med J. 2024 Aug 8;65(12):770–6. doi: 10.3349/ymj.2023.0600 (PMC11605044; doi:10.3349/ymj.2023.0600), 2024-08-08
Supplement: ymj-65-770-s001.pdf [file ymj-65-770-s001.pdf]

**Supplementary Table 1.** Factors Associated with 30-Day Mortality in Patients with Persistent MRSA Bacteremia Who Underwent Antimicrobial Switching during Treatment

| Variable                                         | Overall (n=43)      | Survived (n=34)     | Deceased (n=9)     | HR (95% CI)       | p value |
|--------------------------------------------------|---------------------|---------------------|--------------------|-------------------|---------|
| Sex, male                                        | 20 (46.5)           | 18 (52.9)           | 2 (22.2)           | 0.28 (0.06-1.36)  | 0.114   |
| Age (yr)                                         | 71 (61–81)          | 70 (58–82)          | 81 (61.5–81)       | 1.02 (0.97–1.08)  | 0.102*  |
| Vancomycin MIC $\geq$ 1 mg/L                     | 33 (76.7)           | 26 (76.5)           | 7 (77.8)           | 1.11 (0.23–5.36)  | 0.895   |
| Initial treatment                                |                     |                     |                    |                   |         |
| Definitive antimicrobial agents                  |                     |                     |                    |                   | 0.868   |
| Vancomycin                                       | 32 (74.4)           | 25 (73.5)           | 7 (77.8)           | 1.14 (0.24–5.51)  |         |
| Teicoplanin                                      | 11 (25.6)           | 9 (26.5)            | 2 (22.2)           | Ref               |         |
| Beta-lactams co-administration                   | 25 (58.1)           | 19 (55.9)           | 6 (66.7)           | 1.46 (0.37–5.85)  | 0.591   |
| Time to active antibiotics (days)*               | 2 (1–3)             | 2 (0.75–3.25)       | 2 (0.5–3)          | 0.91 (0.68–1.22)  | 0.542   |
| Treatment duration of initial antibiotics (days) | 10 (7–17)           | 11.5 (7–20.5)       | 7 (6.5–10.5)       | 0.93 (0.89–0.97)  | 0.001*  |
| Secondary agents                                 |                     |                     |                    |                   |         |
| Change to other glycopeptides                    | 24 (55.8)           | 19 (55.9)           | 5 (55.6)           | 0.93 (0.25–3.47)  | 0.915   |
| Change to linezolid                              | 19 (44.2)           | 15 (44.1)           | 4 (44.4)           | Ref               |         |
| Initial laboratory findings                      |                     |                     |                    |                   |         |
| White blood cell count (/ $\mu$ L)               | 12380 (10560–14810) | 12250 (10830–15100) | 12390 (7750–13990) | 1.03 (0.97–1.08)  | 0.332   |
| C-reactive protein (mg/dL)                       | 22.30 (8.78–27.50)  | 22.50 (9.13–27.71)  | 14.69 (8.33–29.26) | 1.00 (0.94–1.06)  | 0.901   |
| Disease severity                                 |                     |                     |                    |                   |         |
| ICU admission within 24 hours*                   | 16 (37.2)           | 11 (32.4)           | 5 (55.6)           | 2.22 (0.60–8.27)  | 0.235   |
| Pitt bacteremia score (initial)                  | 1 (0–3)             | 1 (0–2)             | 3 (0.5–4)          | 1.21 (0.92–1.59)  | 0.171   |
| Pitt bacteremia score (day 4)*                   | 0 (0–2)             | 0 (0–2)             | 1 (0–5)            | 1.16 (0.90–1.51)  | 0.261   |
| Focus of infection                               |                     |                     |                    |                   |         |
| Endocarditis                                     | 6 (14.0)            | 4 (11.8)            | 2 (22.2)           | 2.10 (0.44–10.15) | 0.356   |
| Osteoarticular focus                             | 13 (30.2)           | 12 (35.3)           | 1 (11.1)           | 0.27 (0.03–2.17)  | 0.271   |
| Pneumonia                                        | 1 (2.3)             | 0 (0.0)             | 1 (11.1)           | 7.85 (0.92–67.20) | 0.060*  |
| Surgical wound infection                         | 1 (2.3)             | 1 (2.9)             | 0 (0.0)            | N/A               |         |
| Skin and soft tissue infection                   | 6 (14.0)            | 6 (17.6)            | 0 (0.0)            | N/A               |         |
| Intravascular catheter                           | 7 (16.3)            | 4 (11.8)            | 3 (33.3)           | 2.85 (0.71–11.42) | 0.139   |
| Unknown focus                                    | 6 (14.0)            | 4 (11.8)            | 2 (22.2)           | 1.81 (0.38–8.73)  | 0.458   |
| Metastatic infection                             | 15 (34.9)           | 12 (35.3)           | 3 (33.3)           | 0.93 (0.23–3.73)  | 0.920   |
| Echocardiography                                 | 36 (83.7)           | 29 (85.3)           | 7 (77.8)           | 0.58 (0.12–2.78)  | 0.491   |
| Onset of bacteremia                              |                     |                     |                    |                   |         |
| Nosocomial                                       | 22 (51.2)           | 18 (52.9)           | 4 (44.4)           | Reference         |         |
| Healthcare-associated                            | 12 (27.9)           | 9 (26.5)            | 3 (33.3)           | 1.54 (0.34–6.89)  |         |
| Community-acquired                               | 9 (20.9)            | 7 (20.6)            | 2 (22.2)           | 1.13 (0.21–6.17)  |         |
| Bacteremia duration (days)                       | 11 (6–19)           | 14 (6.5–21.25)      | 8 (6–11.5)         | 0.93 (0.84–1.02)  | 0.123*  |
| Prostheses                                       |                     |                     |                    |                   |         |
| Orthopedic device                                | 8 (18.6)            | 7 (20.6)            | 1 (11.1)           | 0.49 (0.06–3.85)  | 0.490   |
| Cardiovascular device                            | 2 (4.6)             | 2 (5.9)             | 0 (0.0)            | NA                |         |
| Long-term CVC                                    | 8 (18.6)            | 7 (20.6)            | 1 (11.1)           | 0.50 (0.06–4.00)  | 0.513   |
| Removal of eradicable focus                      |                     |                     |                    |                   |         |
| No removal                                       | 15 (34.9)           | 13 (38.2)           | 2 (22.2)           | Reference         |         |
| Non-eradicable                                   | 15 (34.9)           | 11 (32.4)           | 4 (44.4)           | 2.00 (0.37–10.91) |         |
| Removal of focus after day 3*                    | 4 (9.3)             | 3 (8.8)             | 1 (11.1)           | 1.82 (0.17–20.10) |         |
| Removal of focus before day 3*                   | 9 (20.9)            | 7 (20.6)            | 2 (22.2)           | 1.64 (0.23–11.64) |         |
| Charlson comorbidity index                       | 1 (0–4)             | 1 (0–3.25)          | 2 (1–5)            | 1.06 (0.84–1.35)  | 0.610   |
| Immunosuppression                                | 7 (16.3)            | 5 (14.7)            | 2 (22.2)           | 1.52 (0.32–7.32)  | 0.602   |
| ID consultation within 7 days*                   | 32 (74.4)           | 25 (73.5)           | 7 (77.8)           | 1.33 (0.28–6.40)  | 0.723   |

MRSA, methicillin-resistant *Staphylococcus aureus*; MIC, minimal inhibitory concentration; CVC, central venous catheter; ICU, intensive care unit; ID, infectious diseases; IQR, interquartile range; HR, hazard ratio; CI, confidence interval.

Data are presented as numbers (%) or median (interquartile range) unless otherwise indicated.

\*Time points were calculated from the onset of bacteremia.
