# Supplementary material for: Thirty-Day Mortality of Persistent Methicillin-Resistant Staphylococcus aureus Bacteremia: Insights from a Retrospective Cohort Study
Source: PubMed Central journal article supplement — Yonsei Med J. 2024 Aug 8;65(12):770–6. doi: 10.3349/ymj.2023.0600 (PMC11605044; doi:10.3349/ymj.2023.0600), 2024-08-08
Supplement: ymj-65-770-s002.pdf [file ymj-65-770-s002.pdf]

**Supplementary Table 2.** Multivariable Analysis for Factors Associated with 30-Day Mortality in Patients with Persistent MRSA Bacteremia Who Underwent Antimicrobials Switching during Treatment

| Variable                                             | Univariable       |         | Multivariable        |         |
|------------------------------------------------------|-------------------|---------|----------------------|---------|
|                                                      | HR (95% CI)       | p value | Adjusted HR (95% CI) | p value |
| Age, per 1-year                                      | 1.02 (0.97–1.08)  | 0.102   | 1.05 (0.98–1.12)     | 0.202   |
| Treatment duration of initial antibiotics, per 1-day | 0.93 (0.89–0.97)  | 0.001   | 0.93 (0.83–1.05)     | 0.235   |
| Pneumonia                                            | 7.85 (0.92–67.20) | 0.060   | 18.00 (0.72–450.67)  | 0.079   |
| Bacteremia duration, days, per 1-day                 | 0.93 (0.84–1.02)  | 0.123   | 0.94 (0.84–1.06)     | 0.323   |

MRSA, methicillin-resistant *Staphylococcus aureus*; HR, hazard ratio; CI, confidence interval.
