# Supplementary material for: Thirty-Day Mortality of Persistent Methicillin-Resistant Staphylococcus aureus Bacteremia: Insights from a Retrospective Cohort Study
Source: PubMed Central journal article supplement — Yonsei Med J. 2024 Aug 8;65(12):770–6. doi: 10.3349/ymj.2023.0600 (PMC11605044; doi:10.3349/ymj.2023.0600), 2024-08-08
Supplement: ymj-65-770-s003.pdf [file ymj-65-770-s003.pdf]

**Supplementary Table 3.** Clinical Characteristics of Patients with Persistent MRSA Bacteremia Who Underwent Antimicrobials Switching during the Course of Therapy and Those who Did Not

| Variable                           | Overall (n=116)     | With change (n=43)  | Without change (n=73) | p value |
|------------------------------------|---------------------|---------------------|-----------------------|---------|
| Sex, male                          | 60 (51.7)           | 20 (46.5)           | 40 (54.8)             | 0.389   |
| Age (yr)                           | 69 (58.25–81)       | 71 (61–81)          | 67 (58–79)            | 0.455   |
| Vancomycin MIC $\geq$ 1 mg/L       | 73 (62.9)           | 33 (76.7)           | 40 (54.8)             | 0.018   |
| Initial treatment                  |                     |                     |                       |         |
| Definitive antimicrobial agents    |                     |                     |                       | 0.022   |
| Vancomycin                         | 98 (84.5)           | 32 (74.4)           | 66 (90.4)             |         |
| Teicoplanin                        | 18 (15.5)           | 11 (25.6)           | 7 (9.6)               |         |
| Beta-lactams co-administration     | 71 (61.2)           | 25 (58.1)           | 46 (63.0)             | 0.603   |
| Time to active antibiotics (days)* | 2 (1–3)             | 2 (1–3)             | 2 (1–2.5)             | 0.506   |
| Initial laboratory findings        |                     |                     |                       |         |
| White blood cell count (/ $\mu$ L) | 12940 (10570–18080) | 12380 (10560–14810) | 13610 (10490 – 19110) | 0.143   |
| C-reactive protein (mg/dL)         | 19.38 (6.62–26.75)  | 22.30 (8.78–27.50)  | 18.24 (6.01–26.42)    | 0.293   |
| Disease severity                   |                     |                     |                       |         |
| ICU admission within 24 hours*     | 50 (43.1)           | 16 (37.2)           | 34 (46.6)             | 0.325   |
| Pitt bacteremia score (initial)    | 2 (1–3)             | 1 (0–3)             | 2 (1–3.5)             | 0.112   |
| Pitt bacteremia score (day 4)*     | 1 (0–3)             | 0 (0–2)             | 1 (0–4)               | 0.055   |
| Focus of infection                 |                     |                     |                       |         |
| Endocarditis                       | 14 (12.1)           | 6 (14.0)            | 8 (11.0)              | 0.633   |
| Osteoarticular focus               | 29 (25.0)           | 13 (30.2)           | 16 (21.9)             | 0.318   |
| Pneumonia                          | 10 (8.6)            | 1 (2.3)             | 9 (12.3)              | 0.089   |
| Surgical wound infection           | 2 (1.7)             | 1 (2.3)             | 1 (1.4)               | >0.999  |
| Skin and soft tissue infection     | 12 (10.3)           | 6 (14.0)            | 6 (8.2)               | 0.357   |
| Intravascular catheter             | 24 (20.7)           | 7 (16.3)            | 17 (23.3)             | 0.368   |
| Unknown focus                      | 21 (18.1)           | 6 (14.0)            | 15 (20.5)             | 0.373   |
| Metastatic infection               | 33 (28.4)           | 15 (34.9)           | 18 (24.7)             | 0.238   |
| Echocardiography                   | 83 (71.6)           | 36 (83.7)           | 47 (64.4)             | 0.026   |
| Onset of bacteremia                |                     |                     |                       |         |
| Hospital-acquired                  | 63 (54.3)           | 22 (51.2)           | 41 (56.2)             |         |
| Healthcare-associated              | 28 (24.1)           | 12 (27.9)           | 16 (21.9)             |         |
| Community-acquired                 | 25 (21.6)           | 9 (20.9)            | 16 (21.9)             |         |
| Bacteremia duration (days)         | 6 (3–12)            | 11 (6–19)           | 5 (3–8)               | <0.001  |
| Prostheses                         |                     |                     |                       |         |
| Orthopedic device                  | 21 (18.1)           | 8 (18.6)            | 13 (17.8)             | 0.914   |
| Cardiovascular device              | 4 (3.4)             | 2 (4.7)             | 2 (2.7)               | 0.626   |
| Long-term CVC                      | 25 (21.6)           | 8 (18.6)            | 17 (23.3)             | 0.554   |
| Removal of eradicable focus        |                     |                     |                       |         |
| No removal                         | 31 (26.7)           | 15 (34.9)           | 16 (21.9)             | 0.464   |
| Non-eradicable                     | 49 (42.2)           | 15 (34.9)           | 34 (46.6)             |         |
| Removal of focus after day 3*      | 12 (10.3)           | 4 (9.3)             | 8 (11.0)              |         |
| Removal of focus before day 3*     | 24 (20.7)           | 9 (20.9)            | 15 (20.5)             |         |
| Charlson comorbidity index         | 2 (1–4)             | 1 (0–4)             | 2 (1–5)               | 0.043   |
| Immunosuppression                  | 21 (18.1)           | 7 (16.3)            | 14 (19.2)             | 0.695   |
| ID consultation within 7 days*     | 75 (64.7)           | 32 (74.4)           | 43 (58.9)             | 0.091   |

MRSA, methicillin-resistant *Staphylococcus aureus*; CVC, central venous catheter; ICU, intensive care unit; ID, infectious diseases; IQR, interquartile range; HR, hazard ratio; CI, confidence interval.

Data are presented as numbers (%) or median (interquartile range) unless otherwise indicated.

\*Time points were calculated from the onset of bacteremia.
